# Supplementary material for: Small molecule inhibitors in pancreatic cancer
Source: Royal Society of Chemistry journal article supplement (doi:10.1039/c9md00447e), 2020-01-01
Supplement: c9md00447e2.xlsx [file c9md00447e2.xlsx]

## Sheet: Sheet1
Compound	SMILES Code
1	O[C@H]([C@H]1CO)C(F)(F)[C@@H](O1)N2C=CC(N)=NC2=O
2	O=C1C(F)=CNC(N1)=O
3	O=C(O[C@H]1C[C@]([C@@H](OC(C2=CC=CC=C2)=O)C([C@@](CO3)(OC(C)=O)[C@H]3C[C@@H]4O)[C@]4(C)C([C@@H]5OC(C)=O)=O)(O)C(C)(C)C5=C1C)[C@@H]([C@@H](NC(C6=CC=CC=C6)=O)C7=CC=CC=C7)O
4	O=C1C2=C(NCC(CNC3=CC=C(C(N[C@H](CCC(O)=O)C(O)=O)=O)C=C3)N2C=O)CC(N)=C1
5	O=C(N1CCC(N2CCCCC2)CC1)OC3=CC=C(N=C(C(N4C5)=CC([C@@](O)(CC)C(OC6)=O)=C6C4=O)C5=C7CC)C7=C3
6	N[C@@H]1CCCC[C@H]1N.O=C2C(O[Pt]O2)=O
7	O=C1CC2=CC(NC3=NC=C(C(F)(F)F)C(NCC4=CC=CN=C4N(S(=O)(C)=O)C)=N3)=CC=C2N1
8	OC(C([C@H]1CC[C@@H]2O1)C2C(N3CCN(C)CC3)=O)=O
9	CCNCCN(CC1=CC=C(Cl)C=C1)C2=NC=CC=C2.Cl
10	O=C(NOCC1CC1)C2=C(NC3=CC=C(I)C=C3Cl)C(F)=C(F)C=C2
11	O=C(N1)[C@H](CCCl)[C@]2(C)OC([C@@]21[C@H]([C@]3([H])C=CCCC3)O)=O
12	OC(C1=CC=CC=C1SC/C=C(C)/CC/C=C(C)/CC/C=C(C)/C)=O
13	ONC(CCCCCCC(NC1=CC=CC=C1)=O)=O
14	FC1=C(NC2=CN=CC=C2C(NC[C@H](O)CO)=O)C=CC(I)=C1
15	CN1CCN(C2=CC=C(NC3=NC=C(C(N(CC=C)N4C5=NC(C(C)(O)C)=CC=C5)=O)C4=N3)C=C2)CC1
16	C[C@@H]1CN[C@]2([H])C(O[C@@]3(CC(C)=C(C[C@@]4([H])[C@@]5([H])CC[C@@]6([H])[C@]4(C)CC[C@@H](NS(C)(=O)=O)C6)[C@@]5([H])CC3)[C@@H]2C)([H])C1
17	C[C@@H]1[C@@H](O)[C@@H](O)[C@@H](O1)N2C(N=C(C(F)=C2)NC(OCCCCC)=O)=O
18	CC1=CC=C(NC2=NC=CC(N(C)C3=CC4=NN(C)C(C)=C4C=C3)=N2)C=C1S(=O)(N)=O
19	ClC(C=C1)=CC=C1NC2=NN=C(CC3=CC=NC=C3)C4=C2C=CC=C4
20	NC(C1=CC2=C(C3=C(CCC4)N4N=C3C5=NC(C)=CC=C5)C=CN=C2C=C1)=O
21	ClC1=CC=C2C(N=CC=C2NC(C)CCCN(CCO)CC)=C1
22	ClC1=C(OCC2=CC=CC(F)=C2)C=CC(NC3=NC=NC4=CC=C(C5=CC=C(CNCCS(C)(=O)=O)O5)C=C43)=C1
23	BrC1=CC=C(NC2=NC=NC3=C2C=C(OC)C(OCC4CCN(C)CC4)=C3)C(F)=C1
24	CNC(C1=NC=CC(OC2=CC=C(NC(NC3=CC(C(F)(F)F)=C(Cl)C=C3)=O)C=C2)=C1)=O
25	C#CC1=CC(NC2=NC=NC3=CC(OCCOC)=C(OCCOC)C=C32)=CC=C1
26	ClC1=C(NC(C2=CN=C(NC3=NC(C)=NC(N4CCN(CCO)CC4)=C3)S2)=O)C(C)=CC=C1
27	CN(CC1)CCN1CCOC(C=C2OC3CCOCC3)=CC4=C2C(NC5=C(Cl)C=CC6=C5OCO6)=NC=N4
28	CC(C=CC(NC(C1=CC=C(CN2CCN(C)CC2)C=C1)=O)=C3)=C3NC4=NC(C5=CC=CN=C5)=CC=N4
29	O=C(NC1=CC(C2=CC=CC=N2)=C(Cl)C=C1)C3=C(Cl)C=C(S(=O)(C)=O)C=C3
30	CC(C)(C#N)C(C=C1)=CC=C1N(C2=C(N3C)C=NC(C2=C4)=CC=C4C5=CC6=CC=CC=C6N=C5)C3=O
31	CO[C@H]1[C@H](OCCO)CC[C@@H](C[C@@H](C)[C@@H](OC([C@H]2CCCCN2C(C([C@]3(O)O[C@H](C[C@H](OC)/C(C)=C/C=C/C=C/[C@@H](C)C4)CC[C@H]3C)=O)=O)=O)CC([C@H](C)/C=C([C@@H](O)[C@H](C([C@@H]4C)=O)OC)\C)=O)C1
32	CCC(C)SSC1=NC=CN1
33	NC(C1=C2C(NC([C@]3(C)NCCC3)=N2)=CC=C1)=O
34	CC(NC1=CC=CC(N2C3=C(C)C(N(C)C(NC4=CC=C(I)C=C4F)=C3C(N(C5CC5)C2=O)=O)=O)=C1)=O
35	FC1=C2C(N(C)C=N2)=CC(C(NOCCO)=O)=C1NC3=CC=C(Br)C=C3Cl
36	OC(CNC1=C(OC)C=CC(CS(/C=C/C2=C(OC)C=C(OC)C=C2OC)(=O)=O)=C1)=O
37	O=C(C1CC1)N(CC2)CCN2C(C3=C(F)C=CC(CC(C4=C5C=CC=C4)=NNC5=O)=C3)=O
38	CNC(C(C=CC=C1)=C1SC2=CC3=C(C=C2)C(/C=C/C4=NC=CC=C4)=NN3)=O
39	[NH3][Pt](Cl)(Cl)[NH3]
40	O=C(C(C)=C1N)C2=C([C@@H](COC(N)=O)[C@]3(OC)N2C[C@H]4[C@@H]3N4)C1=O
41	FC1=CC=C(NC(/C2=C\C3=C(C)C(C(NCCN(CC)CC)=O)=C(C)N3)=O)C2=C1
42	O=C(NC(C)(C)C)NC1=NC2=NC(NCCCCN(CC)CC)=NC=C2C=C1C3=CC(OC)=CC(OC)=C3
43	CN([C@H]1[C@@H](OC)[C@]2(C)O[C@@]([H])(N3C4=CC=CC=C4C5=C6C(CNC6=O)=C7C8=C(C=CC=C8)N2C7=C53)C1)C(C9=CC=CC=C9)=O
44	NC1=NC(NC2=CC(CC[C@@H](N3CCCC3)CC4)=C4C=C2)=NN1C5=CC6=C(N=N5)C7=CC=CC=C7CCC6
45	CONC(C1=C(NC2=CC(NC3=CC(C)=NN3C(C)C)=NC=C2Cl)C=CC=C1)=O
46	CS(C1=CC=CC(CNC2=NC(NC3=CC(CCC(N4)=O)=C4C=C3)=NC=C2C(F)(F)F)=C1)(=O)=O
47	OCCONC(C1=CC2=C(N=CN2C)C(F)=C1NC3=C(F)C=C(Br)C=C3)=O
48	FC1=CC(I)=CC=C1NC2=C(C(N3CC(O)([C@]4([H])CCCCN4)C3)=O)C=CC(F)=C2F
49	CC1=CC=CC(CC(N2C3=CC=C(C4=CN(C)C5=NC=NC(N)=C45)C(F)=C3CC2)=O)=N1
50	O=C(NC(CCC1=CC(OC)=CC=C1OC)=O)NC2=CC(C(N=C(SC)N3)=C3C4=CC=C(F)C=C4)=CC=N2
51	OCC[C@@H]1CCCCN1C2=NC3=C(CC)C=NN3C(NCC4=C[N+]([O-])=CC=C4)=C2
52	O=S(C1(CC1)C2=CC(N3[C@H](C)COCC3)=NC(C4=CC=NC5=C4C=CN5)=N2)(C)=N
53	O=C(/C(CSC/1)=C/C2=CC(OC)=C(OC)C=C2)C1=C\C3=CC=C(OC)C(OC)=C3
54	OC(C1=CC=C(N(CC2=CC=C(C3CCCCC3)C=C2)C(C(C(C)C)N(C)S(=O)(C4=C(F)C(F)=C(F)C(F)=C4F)=O)=O)C=C1)=O
55	O=C(NC1=CC(S(C=C2)(=O)=O)=C2C=C1)C3=C(OCCCN)C=CC(Cl)=C3
56	COC([C@@H](NC([C@H](C(C)C)NC(NC1=CC(C(F)(F)F)=CC(C(F)(F)F)=C1)=O)=O)CC2=CN(C)C=N2)=O
57	COC([C@@H](NC(C(C(CC)C)NC(NC1=CC(C(F)(F)F)=CC(C(F)(F)F)=C1)=O)=O)CC2=CN(C)C=N2)=O
58	CC1(C)CCCC2=C1C=CC(C(OC[C@@H]3C)=C3C4=O)=C2C4=O
59	ClC1=CC=C(C2=N[C@@H](CC(OC(C)(C)C)=O)C3=NN=C(C)N3C4=C2C(C)=C(C)S4)C=C1
60	ClC1=CC=C(C2=N[C@@H](CC(NCC)=O)C3=NN=C(C)N3C4=C2C=C(OC)C=C4)C=C1
61	ONC(/C=C/C(C=C1)=CC=C1C2=CC=C(OC)C=C2)=O
62	ONC(CCCC/C=C(C(NCCCN(C)C)=O)\COC1=CC=CC2=CC=CC=C21)=O
63	NC1=CC=CC=C1NC(C(C=C2)=CC=C2CNC3=NC=CC(C4=CN=CC=C4)=N3)=O
64	O=S(NC1=CC=CC=C1)(C2=CC=CC(/C=C/C(NO)=O)=C2)=O
65	O=C(NO)/C=C/C1=CC=C(CNCCC2=C(C)NC3=C2C=CC=C3)C=C1
66	O=S(NC1=CC(SCC(O)=O)=C(O)C2=CC=CC=C21)(C3=CC=C(Br)C=C3)=O
67	O=C(NC1=CC=C(NC2=CC=NC=C2)C=C1)C(C=C3)=CC=C3NC4=CC=NC5=CC=C([N+]([O-])=O)C=C54
68	OC1=C(O)C(O)=CC(C=CC=C2O)=C1C2=O
69	CC(C)C1=CC=CC=C1CC2=CC(C(NC3=CC=C(S(C4=C(C(C)(C)C)C=CC=C4)(=O)=O)C=C3)=O)=C(O)C(O)=C2O
70	O=C(NS(C1=CC=C(N[C@H](CCN(C)C)CSC2=CC=CC=C2)C([N+]([O-])=O)=C1)(=O)=O)C(C=C3)=CC=C3N(CC4)CCN4CC5=CC=CC=C5C6=CC=C(Cl)C=C6
71	C[C@@]1(C(NC2=CC=C(F)N=C2)=O)CCCN1C(N=C3NC4=NNC(C5CC5)=C4)=NN6C3=CC=C6
72	O=C(NC[C@H]1C[C@H]2[C@@H](CN3CCC(CC4=CC=CC=C4)CC3)C[N@@]1CC2)C5=CC(OCO6)=C6C=C5
73	O=C1NC2=CC(Cl)=C(F)C=C2[C@@]13[C@@H](CC(C)(C)C)N[C@@H](C(NCC[C@H](O)CO)=O)[C@@H]3C4=CC=C(F)C(Cl)=C4
74	CCOC(C1=C(NC(C2=CC=C([N+]([O-])=O)S2)=O)SC3=C1CC(C)(C)NC3(C)C)=O
75	O=C1[C@@H](O)[C@](C)(O)C(CC[C@]2(CO)C3CCC4=COC=C24)[C@]3(C)C1
76	O=C(O[C@@H]1C[C@@H](N2CCCCCCN[C@@H](C)C(N[C@H](C(C)(C)C)C(N3[C@H](C(N[C@H]4C(C=CC=C5)=C5CCC4)=O)CCC3)=O)=O)CCC[C@@H]2C1)NC6=C(OC)C=CC(OC)=C6
77	ClC1=C(F)C=C(C2=CC=C(C)C(C(C(N3)=O)=C(O)[C@@]43CC[C@H](OC)CC4)=C2)C=C1
78	OC1=CC=C(C[C@@H]2N(C(CCN3C(NCC4=CC=CC=C4)=O)=O)[C@]3([H])CN(CC5=CC=CC6=C5C=CC=C6)C2=O)C=C1
79	O=C1CC[C@@]2(C)C(CC[C@@H]([C@@H]3CC4)[C@@H]2CC3=C(C)C[C@]54O[C@H](C[C@H](C)CN6)[C@@H]6[C@H]5C)=C1
80	O=S(N(CC(F)(F)F)C[C@]12[C@H]3CC4=CC(/C=C/CN5CCC(C(F)(F)F)CC5)=CC=C4C[C@@H]1CC3)(N2)=O
81	O=C(OCCCCCP(OCC)(OCC)=O)C1=CC=CC=C1SC/C=C(C)/CC/C=C(C)/CC/C=C(C)/C
82	O=C1N(CC2=CC=CC=C2C)C3=NCCN3C4=C1CN(CC4)CC5=CC=CC=C5
